# Supplementary material for: An analysis of extensible modelling for functional genomics data
Source: Springer Nature journal article supplement (doi:10.1186/1471-2105-6-235), 2005-09-27

# Overview of Functional Genomics Experiments

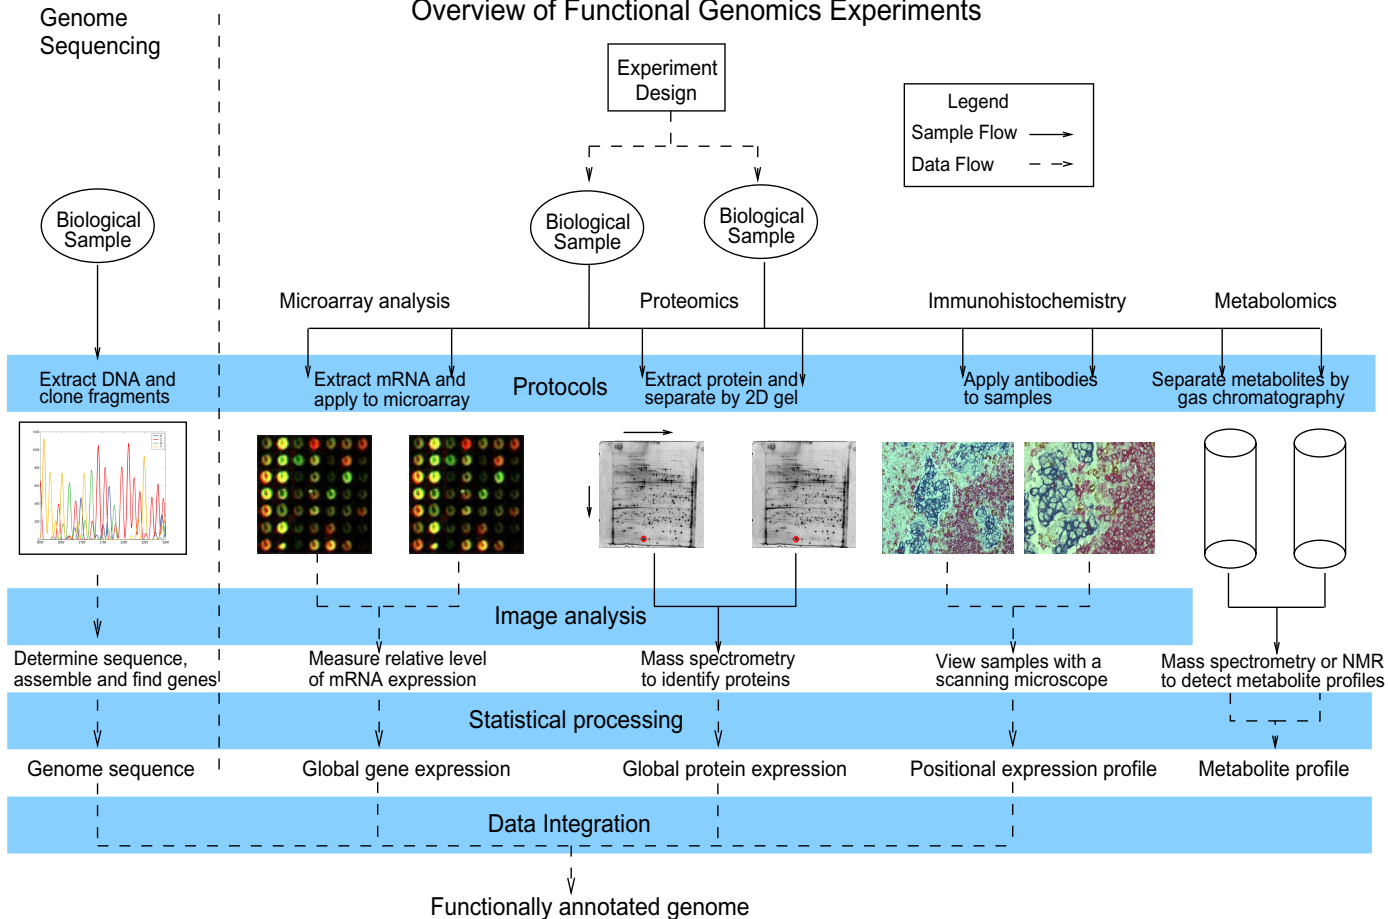

Supplement: 12859_2005_560_MOESM2_ESM.pdf [file 12859_2005_560_MOESM2_ESM.pdf]
